# Supplementary material for: Validation of a pre-established triage protocol for critically ill patients in a COVID-19 outbreak under resource scarcity: A retrospective multicenter cohort study
Source: PubMed Central journal article supplement (PMC10174588; doi:10.1371/journal.pone.0285690), 2023-05-11
Supplement: pone.0285690.s002.pdf [file pone.0285690.s002.pdf]

|                                          | P1 (N=158)       | P2 (N=34)         | P3 (N=17)        | P4 (N=16)        | Total (N=225)     | p value              |
|------------------------------------------|------------------|-------------------|------------------|------------------|-------------------|----------------------|
| <b>Age (years)</b>                       | 62.7 (11.8)      | 65.1 (9.3)        | 59.9 (12.6)      | 66.5 (16.0)      | 63.1 (11.9)       | 0.293 <sup>1</sup>   |
| <b>Gender</b>                            |                  |                   |                  |                  |                   | 0.714 <sup>2</sup>   |
| F                                        | 42 (27%)         | 7 (21%)           | 6 (35%)          | 4 (25%)          | 59 (26%)          |                      |
| M                                        | 116 (73%)        | 27 (79%)          | 11 (65%)         | 12 (75%)         | 166 (74%)         |                      |
| <b>BMI</b>                               |                  |                   |                  |                  |                   | 0.634 <sup>1</sup>   |
| N missing                                | 2                | 1                 | 0                | 0                | 3                 |                      |
| Mean (SD)                                | 29.6 (6.8)       | 29.6 (4.6)        | 28.2 (6.1)       | 31.2 (8.7)       | 29.6 (6.6)        |                      |
| <b>Hypertension</b>                      | 90 (57%)         | 21 (62%)          | 3 (18%)          | 11 (69%)         | 125 (56%)         | 0.008 <sup>2</sup>   |
| <b>Type 2 diabetes</b>                   | 47 (30%)         | 9 (26%)           | 2 (12%)          | 8 (50%)          | 66 (29%)          | 0.121 <sup>2</sup>   |
| <b>SAPS2</b>                             | 37 [28 - 47]     | 50 [42 - 62]      | 24 [18 - 31]     | 49 [32 - 65]     | 40 [29 - 49]      | < 0.001 <sup>3</sup> |
| <b>Onset to ICU time (days)</b>          |                  |                   |                  |                  |                   | < 0.001 <sup>3</sup> |
| N missing                                | 4                | 2                 | 0                | 0                | 6                 |                      |
| Median [Q1 - Q3]                         | 8 [6 - 11]       | 7 [5 - 11]        | 7 [5 - 12]       | 4 [3 - 5]        | 7 [5 - 11]        |                      |
| <b>SOFA score (day 0)</b>                | 5 [3 - 6]        | 9 [8 - 10]        | 2 [2 - 3]        | 7 [4 - 9]        | 5 [3 - 7]         |                      |
| <b>Mechanical ventilation</b>            | 130 (82%)        | 34 (100%)         | 0 (0%)           | 12 (75%)         | 176 (78%)         |                      |
| <b>PaO2/FiO2</b>                         |                  |                   |                  |                  |                   |                      |
| N missing                                | 2                | 0                 | 0                | 0                | 2                 |                      |
| Median [Q1 - Q3]                         | 124 [94 - 160]   | 108 [82 - 157]    | 272 [222 - 300]  | 118 [95 - 158]   | 125 [94 - 178]    |                      |
| <b>Vasopressors</b>                      |                  |                   |                  |                  |                   |                      |
| No                                       | 113 (72%)        | 1 (3%)            | 17 (100%)        | 8 (50%)          | 139 (62%)         |                      |
| Dobutamine only                          | 1 (1%)           | 0 (0%)            | 0 (0%)           | 0 (0%)           | 1 (0%)            |                      |
| Epi-/Norepinephrine < 0.1 µg/kg/min      | 19 (12%)         | 3 (9%)            | 0 (0%)           | 3 (19%)          | 25 (11%)          |                      |
| Epi-/Norepinephrine > 0.1 µg/kg/min      | 25 (16%)         | 30 (88%)          | 0 (0%)           | 5 (31%)          | 60 (27%)          |                      |
| <b>Glasgow coma score</b>                |                  |                   |                  |                  |                   |                      |
| N missing                                | 1                | 0                 | 0                | 0                | 1                 |                      |
| Median [Q1 - Q3]                         | 15 [15 - 15]     | 15 [15 - 15]      | 15 [15 - 15]     | 15 [14 - 15]     | 15 [15 - 15]      |                      |
| <b>Serum creatinine (µmol/L)</b>         |                  |                   |                  |                  |                   |                      |
| N missing                                | 1                | 0                 | 0                | 0                | 1                 |                      |
| Median [Q1 - Q3]                         | 72 [60 - 91]     | 115 [84 - 156]    | 76 [64 - 93]     | 105 [61 - 168]   | 77 [61 - 100]     |                      |
| <b>Platelet count (10<sup>9</sup>/L)</b> |                  |                   |                  |                  |                   |                      |
| N missing                                | 1                | 0                 | 0                | 0                | 1                 |                      |
| Median [Q1 - Q3]                         | 223 [181 - 290]  | 169 [126 - 262]   | 250 [190 - 293]  | 190 [130 - 261]  | 215 [167 - 289]   |                      |
| <b>Bilirubin (µmol/L)</b>                |                  |                   |                  |                  |                   |                      |
| N missing                                | 9                | 1                 | 1                | 0                | 11                |                      |
| Median [Q1 - Q3]                         | 9.0 [7.0 - 14.0] | 11.0 [8.0 - 14.0] | 8.5 [6.0 - 12.0] | 9.0 [6.0 - 12.0] | 10.0 [7.0 - 13.8] |                      |
| <b>ECMO (day 0)</b>                      |                  |                   |                  |                  |                   |                      |
| No                                       | 158 (100%)       | 33 (97%)          | 17 (100%)        | 16 (100%)        | 224 (100%)        |                      |
| VV                                       | 0 (0%)           | 1 (3%)            | 0 (0%)           | 0 (0%)           | 1 (0%)            |                      |
| VA                                       | 0 (0%)           | 0 (0%)            | 0 (0%)           | 0 (0%)           | 0 (0%)            |                      |
| <b>Mortality</b>                         | 39 (25%)         | 14 (41%)          | 0 (0%)           | 8 (50%)          | 61 (27%)          | 0.001 <sup>2</sup>   |
| <b>Discharged alive</b>                  | 101 (64%)        | 12 (35%)          | 17 (100%)        | 8 (50%)          | 138 (61%)         | < 0.001 <sup>2</sup> |
| <b>Raw length of ICU stay (days)</b>     | 11 [5 - 21]      | 16 [8 - 32]       | 3 [2 - 12]       | 8 [3 - 16]       | 11 [5 - 21]       | < 0.001 <sup>3</sup> |
| <b>Length of ventilation (days)</b>      | 9 [4 - 17]       | 16 [6 - 28]       | 0 [0 - 7]        | 6 [1 - 15]       | 9 [4 - 17]        | < 0.001 <sup>3</sup> |
| <b>Treatment withheld or withdrawn</b>   | 27 (17%)         | 7 (21%)           | 0 (0%)           | 6 (38%)          | 40 (18%)          | 0.032 <sup>2</sup>   |

1. Linear Model ANOVA
2. Fisher's Exact Test for Count Data
3. Kruskal-Wallis rank sum test
