# Supplementary material for: Validation of a pre-established triage protocol for critically ill patients in a COVID-19 outbreak under resource scarcity: A retrospective multicenter cohort study
Source: PubMed Central journal article supplement (PMC10174588; doi:10.1371/journal.pone.0285690), 2023-05-11
Supplement: pone.0285690.s003.pdf [file pone.0285690.s003.pdf]

|                                        | P1 (N=58) | P2 (N=13) | P3 (N=34) | P4 (N=46) | Total (N=151) | p value            |
|----------------------------------------|-----------|-----------|-----------|-----------|---------------|--------------------|
| <b>Priority level, day 0 (tension)</b> |           |           |           |           |               | 0.026 <sup>1</sup> |
| P1                                     | 38 (66%)  | 10 (77%)  | 29 (85%)  | 34 (74%)  | 111 (74%)     |                    |
| P2                                     | 18 (31%)  | 1 (8%)    | 3 (9%)    | 5 (11%)   | 27 (18%)      |                    |
| P3                                     | 0 (0%)    | 1 (8%)    | 0 (0%)    | 4 (9%)    | 5 (3%)        |                    |
| P4                                     | 2 (3%)    | 1 (8%)    | 2 (6%)    | 3 (7%)    | 8 (5%)        |                    |

1. Pearson's Chi-squared test

Since no recovered cardiac arrest was recorded during initial ICU stay, the second step of priority allocation (on day 7 to 10) in tension was identical to that in saturation.
