# Supplementary material for: Validation of a pre-established triage protocol for critically ill patients in a COVID-19 outbreak under resource scarcity: A retrospective multicenter cohort study
Source: PubMed Central journal article supplement (PMC10174588; doi:10.1371/journal.pone.0285690), 2023-05-11

### A Outcome by priority level at d0 (tension, P4 / others)

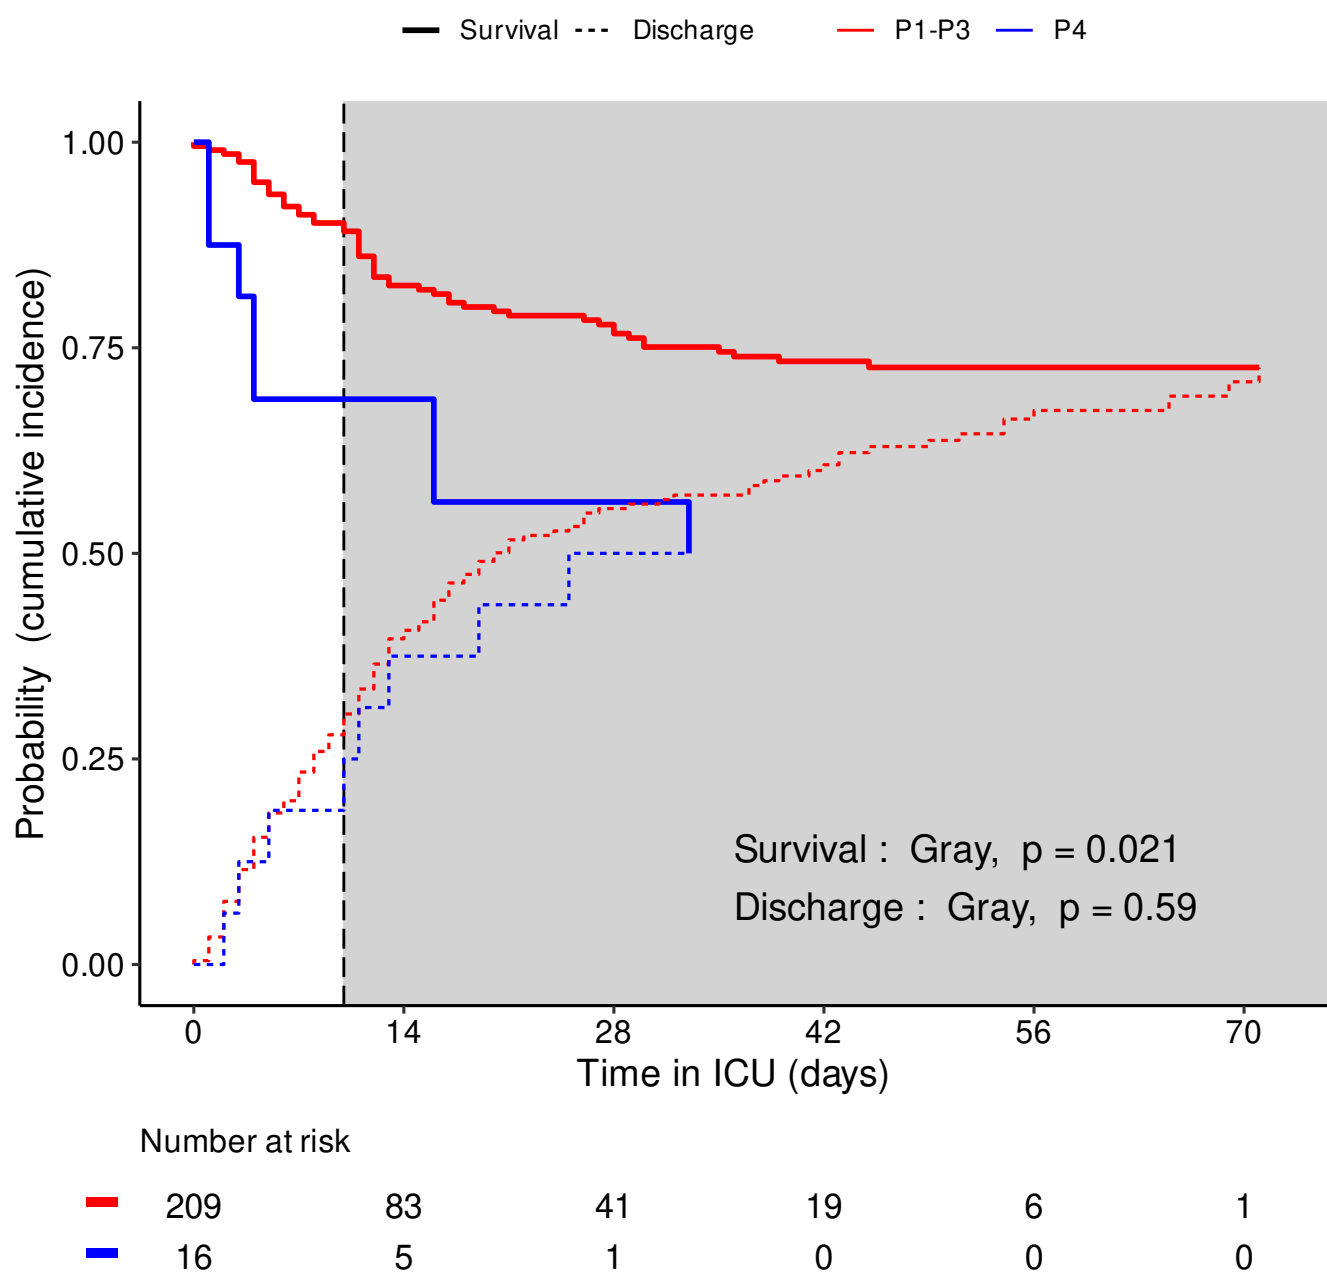

### B Outcome by priority level at d0 (tension, all P levels)

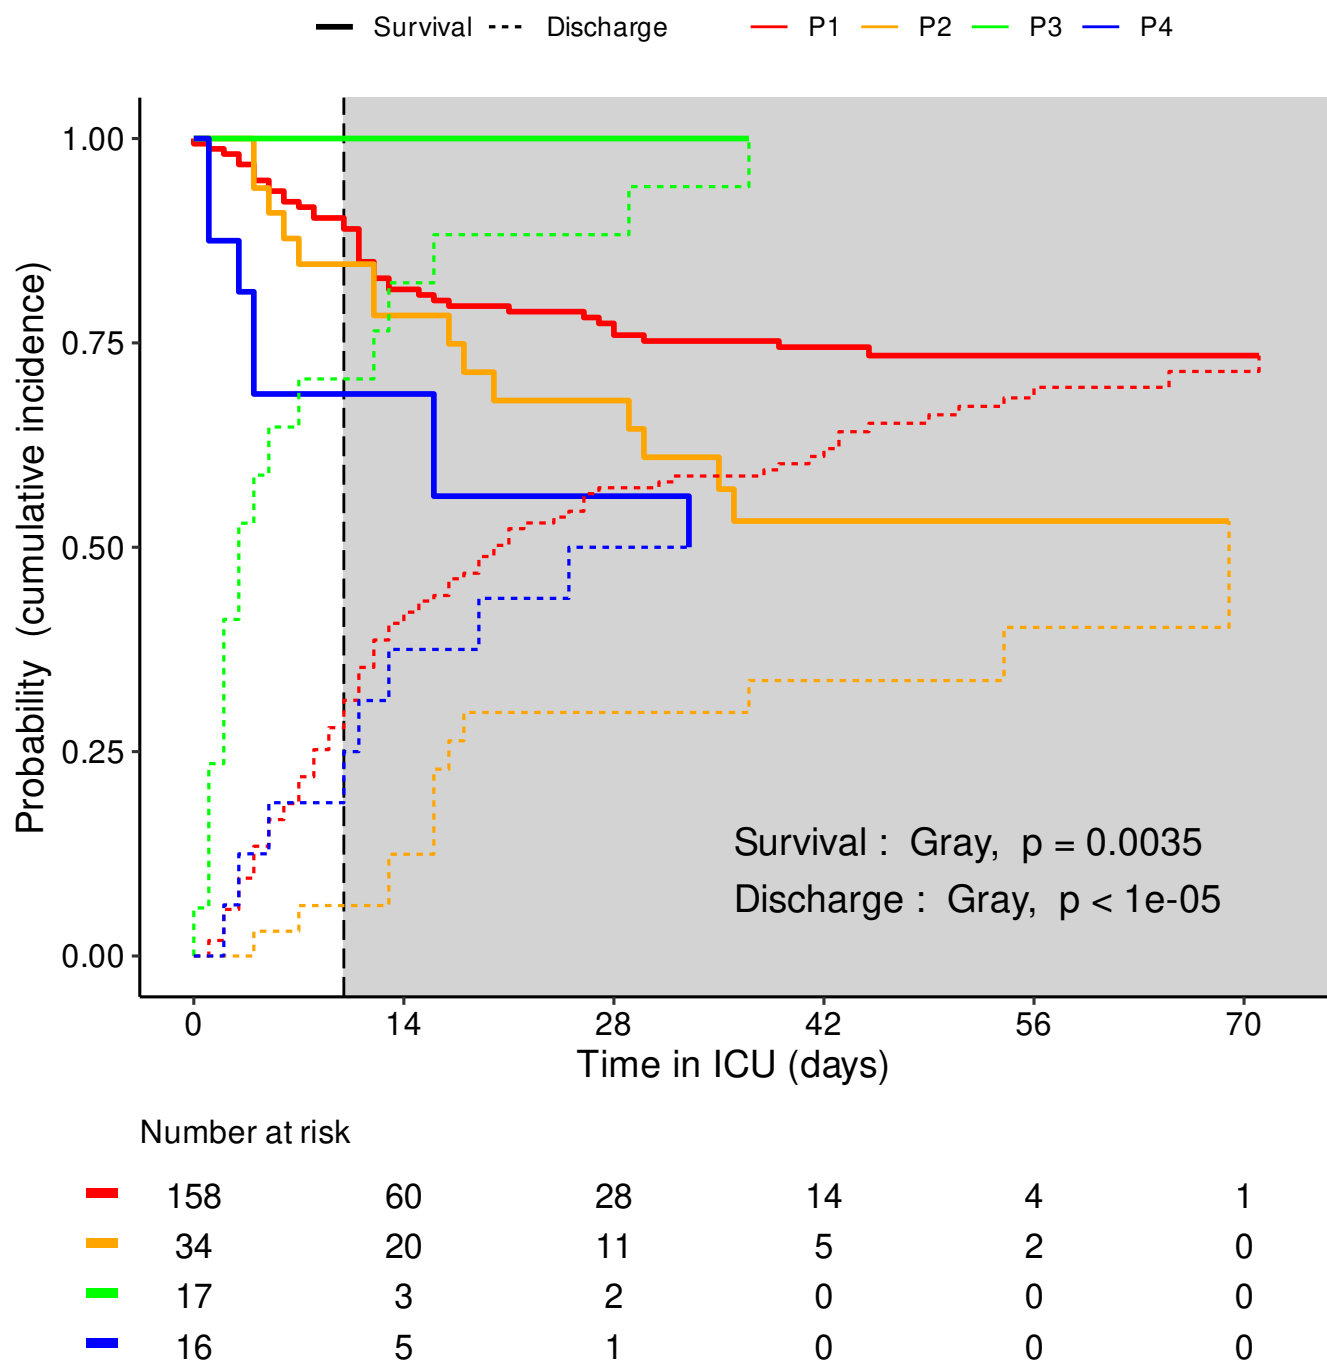

Supplement: pone.0285690.s004.pdf [file pone.0285690.s004.pdf]
